# Supplementary material
Source: PubMed Central journal article supplement (PMC3273557)
Supplement: 12192_2011_296_MOESM1_ESM.pdf [file 12192_2011_296_MOESM1_ESM.pdf]

# Heterooligomeric Complexes of Human Small Heat Shock Proteins

## Cell Stress and Chaperones

Evgeny V. Mymrikov, Alim S. Seit-Nebi and Nikolai B. Gusev

Corresponding author: Nikolai B. Gusev, Department of Biochemistry,  
School of Biology, Moscow State University, Moscow 119991, Russian Federation  
Tel/Fax 7-495-939-2747; E-mail [NBGusev@mail.ru](mailto:NBGusev@mail.ru)

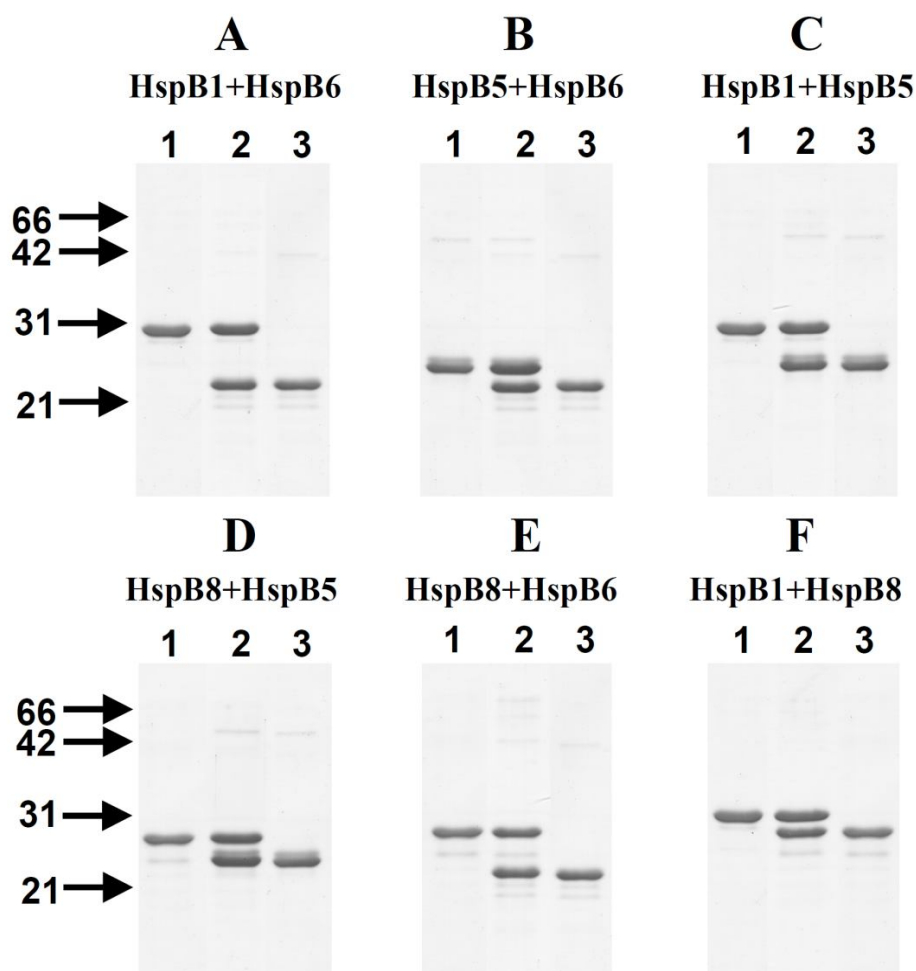

**Online Resource 1. Reduction of disulfide crosslinked wild type HspB1 and Cys-mutants of human small heat shock proteins.** Isolated small heat shock proteins (lanes 1 and 3) or their pairwise mixture (lane 2) were subjected to subunit exchange followed by mild oxidation as described in Material and methods. The samples thus obtained were subjected to reduction and SDS-gel electrophoresis. **A**, HspB1+HspB6; **B**, HspB5+HspB6; **C**, HspB1+HspB5; **D**, HspB8+HspB5; **E**, HspB8+HspB6; **F**, HspB8+HspB1. Trace amounts of non-reduced disulfide crosslinked dimers are detected as a very faint bands with apparent molecular masses of 42 - 66 kDa. The positions of molecular mass standards (in kilodaltons) are indicated by arrows.
